# Supplementary material for: Development of phenazine-2,3-diol-based photosensitizers: effect of substitution of the cyano group for the nitro group on singlet oxygen generation
Source: Royal Society of Chemistry journal article supplement (doi:10.1039/d3nj03214k), 2023-01-01
Supplement: d3nj03214k1.pdf [file d3nj03214k1.pdf]

## Electronic Supplementary Information

### **Development of phenazine-2,3-diol-based photosensitizers: effect of substitution of cyano group for nitro group on singlet oxygen generation**

Kazuki Ohira, Chih-Hsin Yu, Keiichi Imato and Yousuke Ooyama\*

*Applied Chemistry Program, Graduate School of Advanced Science and Engineering, Hiroshima University, 1-4-1 Kagamiyama, Higashi-Hiroshima 739-8527, Japan.  
E-mail: yooyama@hiroshima-u.ac.jp*

## 1. Synthesis

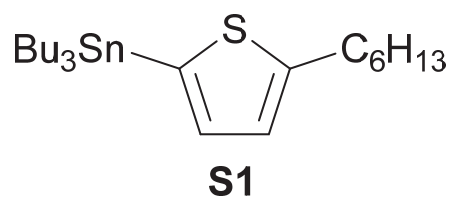

**S1** was synthesized by the method in our previous work.<sup>1</sup>

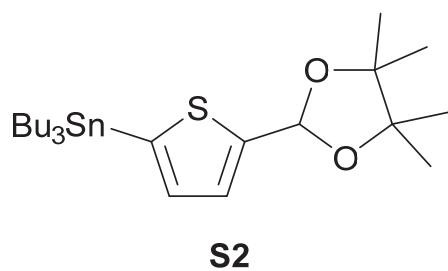

**S2** was synthesized by the method in our previous work.<sup>2</sup>

## Reference

1. K. Imato, K. Ohira, M. Yamaguchi, T. Enoki and Y. Ooyama, *Mater. Chem. Front.*, 2020, **4**, 589–596.
2. K. Ohira, K. Imato and Y. Ooyama, *Mater. Chem. Front.*, 2021, **5**, 5298–5304.



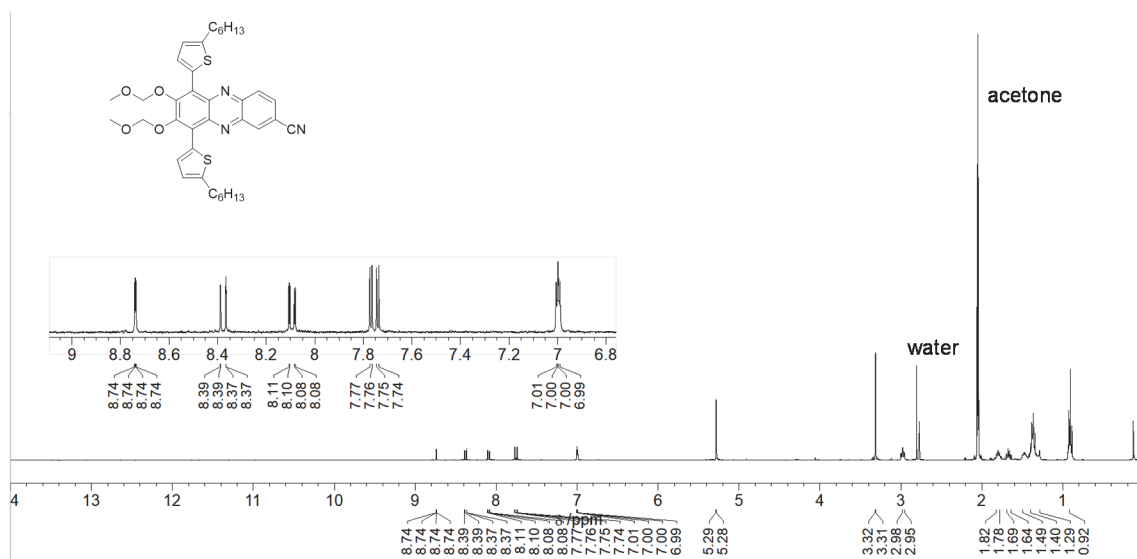

**Fig. S3** <sup>1</sup>H NMR spectrum of compound 3 in Acetone-*d*<sub>6</sub>.

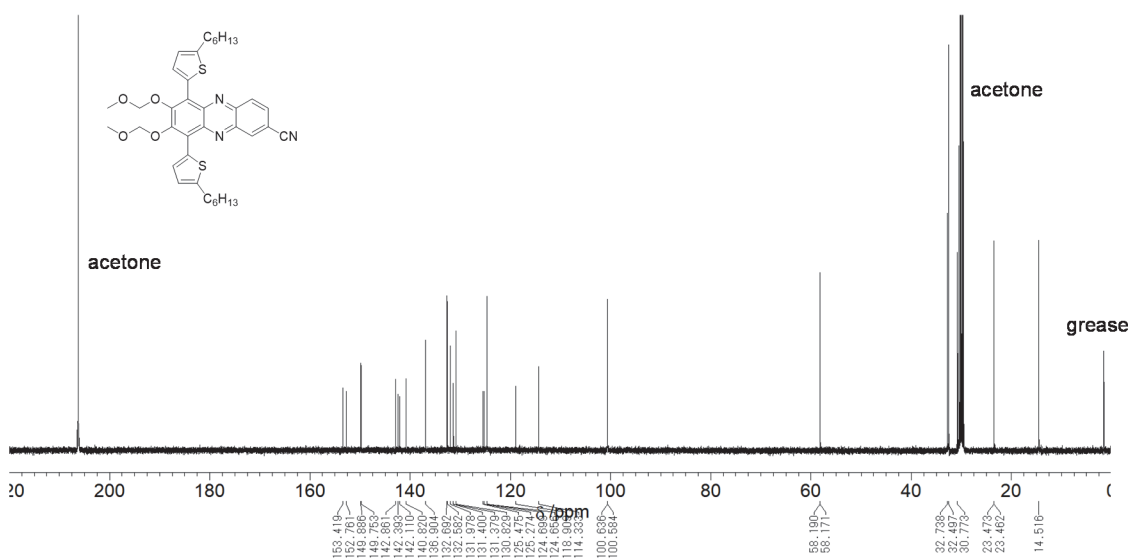

**Fig. S4** <sup>13</sup>C NMR spectrum of compound 3 in Acetone-*d*<sub>6</sub>.

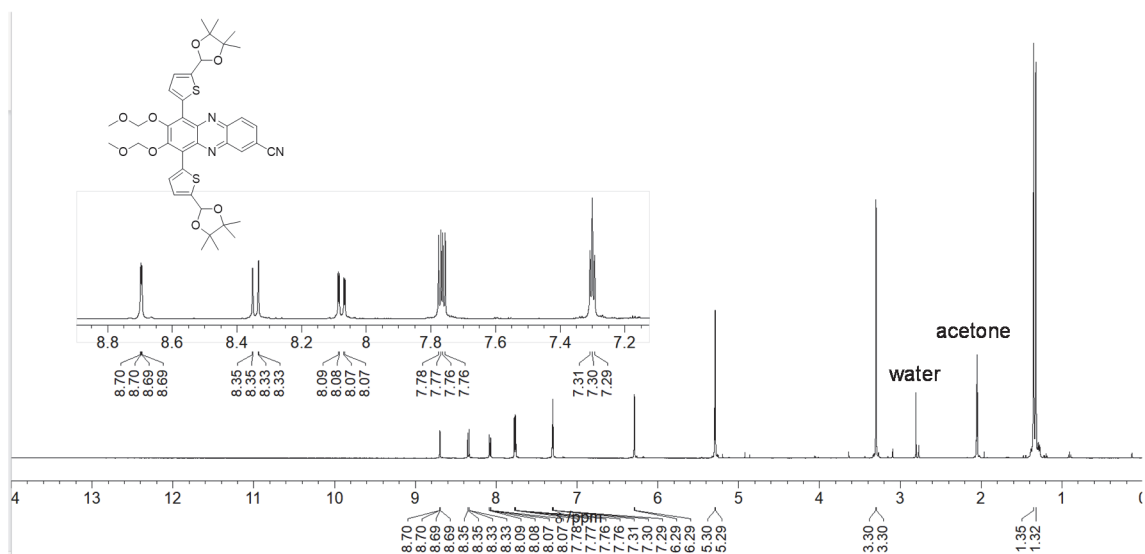

**Fig. S5** <sup>1</sup>H NMR spectrum of compound 4 in Acetone-*d*<sub>6</sub>.

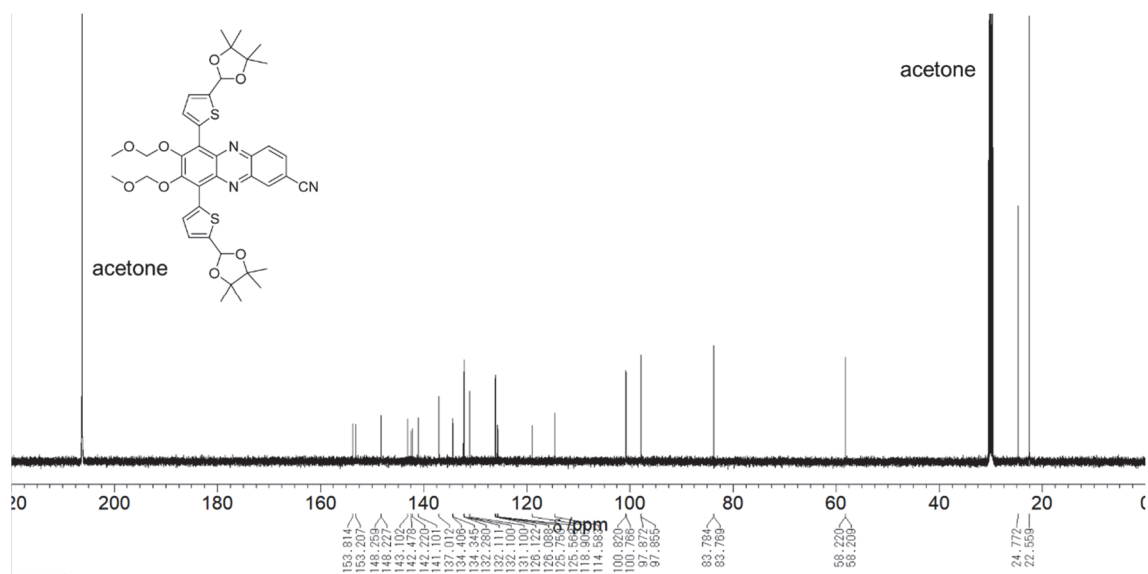

**Fig. S6** <sup>13</sup>C NMR spectrum of compound 4 in Acetone-*d*<sub>6</sub>.

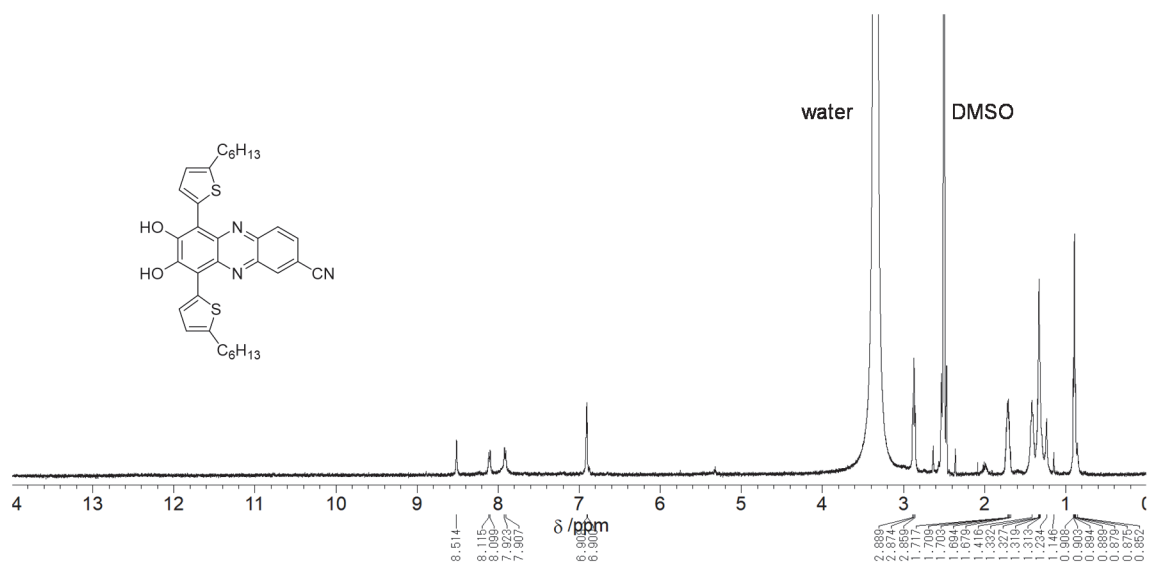

**Fig. S7**  $^1\text{H}$  NMR spectrum of YC-1 in  $\text{DMSO-}d_6$ .

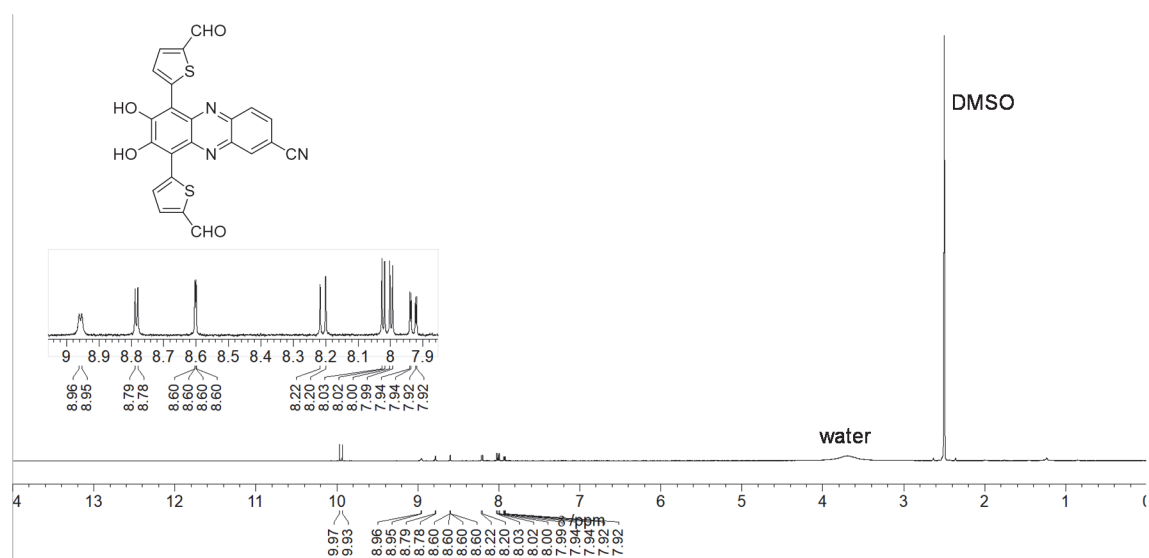

**Fig. S8**  $^1\text{H}$  NMR spectrum of YC-2 in  $\text{DMSO-}d_6$ .

### 3. Theoretical calculation

**Table S1** The cartesian coordinates of  $S_0$  state geometry of **KI-3** optimized by DFT at the B3LYP/6-31G(d,p)/THF-IEFPCM level.

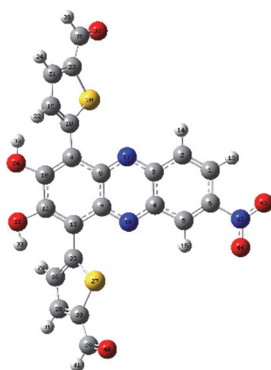

| Tag | Symbol | X        | Y        | Z        | Tag | Symbol | X        | Y        | Z        |
|-----|--------|----------|----------|----------|-----|--------|----------|----------|----------|
| 1   | C      | 0.129279 | 4.480833 | -0.17629 | 23  | C      | 5.683693 | -0.50717 | -0.18344 |
| 2   | C      | 1.00039  | 3.426133 | -0.24896 | 24  | H      | 6.222294 | -1.85333 | -1.79949 |
| 3   | C      | 0.523033 | 2.086954 | -0.14077 | 25  | C      | -2.44581 | -2.05075 | 0.378662 |
| 4   | C      | -0.8813  | 1.851643 | 0.042748 | 26  | C      | -2.9908  | -2.93379 | 1.30129  |
| 5   | C      | -1.77148 | 2.955123 | 0.116823 | 27  | S      | -3.6894  | -1.35622 | -0.62955 |
| 6   | C      | -1.25572 | 4.222542 | 0.007386 | 28  | C      | -4.39608 | -3.05502 | 1.196384 |
| 7   | C      | -0.51524 | -0.41524 | 0.072715 | 29  | H      | -2.39895 | -3.43773 | 2.057335 |
| 8   | C      | 0.90848  | -0.17849 | -0.10604 | 30  | C      | -4.92595 | -2.2713  | 0.191837 |
| 9   | C      | 1.819375 | -1.29201 | -0.18155 | 31  | H      | -5.00203 | -3.68366 | 1.838975 |
| 10  | C      | 1.304481 | -2.57256 | -0.0639  | 32  | O      | -0.44654 | -4.11233 | 0.149021 |
| 11  | C      | -0.11251 | -2.80908 | 0.099313 | 33  | H      | -1.41544 | -4.19293 | 0.177018 |
| 12  | C      | -1.01575 | -1.76425 | 0.184146 | 34  | O      | 2.04717  | -3.69382 | -0.08076 |
| 13  | H      | 0.467826 | 5.505281 | -0.25473 | 35  | H      | 2.98899  | -3.45267 | -0.11704 |
| 14  | H      | 2.064464 | 3.581397 | -0.38806 | 36  | C      | 6.966984 | 0.073277 | 0.182057 |
| 15  | H      | -2.83105 | 2.785091 | 0.255635 | 37  | O      | 7.1249   | 0.916024 | 1.054704 |
| 16  | N      | -1.37184 | 0.600177 | 0.147184 | 38  | H      | 7.822833 | -0.31704 | -0.40442 |
| 17  | N      | 1.390189 | 1.059852 | -0.2124  | 39  | C      | -6.3274  | -2.14521 | -0.17903 |
| 18  | C      | 3.266503 | -1.10438 | -0.37266 | 40  | O      | -6.74704 | -1.42071 | -1.07097 |
| 19  | C      | 4.073298 | -1.78289 | -1.27626 | 41  | H      | -7.01261 | -2.77566 | 0.422478 |
| 20  | S      | 4.212494 | -0.02416 | 0.619144 | 42  | N      | -2.17525 | 5.364787 | 0.083375 |
| 21  | C      | 5.441831 | -1.44116 | -1.16989 | 43  | O      | -1.69468 | 6.495729 | -0.01609 |
| 22  | H      | 3.681133 | -2.46672 | -2.02104 | 44  | O      | -3.37563 | 5.137745 | 0.242264 |

**Table S2** The cartesian coordinates of  $S_0$  state geometry of **KI-5** optimized by DFT at the B3LYP/6-31G(d,p)/THF-IEFPCM level.

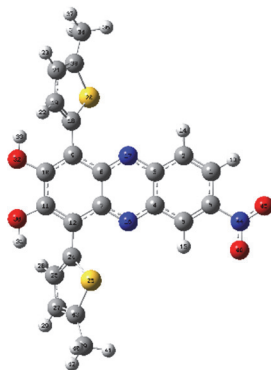

| Tag | Symbol | X        | Y        | Z        | Tag | Symbol | X        | Y        | Z        |
|-----|--------|----------|----------|----------|-----|--------|----------|----------|----------|
| 1   | C      | -0.44508 | 4.473513 | -0.15934 | 24  | C      | -2.16403 | -2.35075 | 0.283723 |
| 2   | C      | 0.555055 | 3.53997  | -0.22643 | 25  | C      | -2.64456 | -3.25768 | 1.204988 |
| 3   | C      | 0.255775 | 2.148644 | -0.12921 | 26  | S      | -3.44824 | -1.89288 | -0.8233  |
| 4   | C      | -1.10876 | 1.732538 | 0.035403 | 27  | C      | -4.02285 | -3.57868 | 1.028994 |
| 5   | C      | -2.13395 | 2.711869 | 0.104818 | 28  | H      | -2.03806 | -3.65032 | 2.014715 |
| 6   | C      | -1.78715 | 4.037197 | 0.00741  | 29  | H      | -4.56657 | -4.26174 | 1.672155 |
| 7   | C      | -0.45496 | -0.46879 | 0.055373 | 30  | O      | 0.079256 | -4.12314 | 0.109977 |
| 8   | C      | 0.932488 | -0.04732 | -0.09459 | 31  | H      | -0.87812 | -4.30191 | 0.141977 |
| 9   | C      | 1.980137 | -1.03078 | -0.14623 | 32  | O      | 2.522569 | -3.37576 | -0.06395 |
| 10  | C      | 1.630089 | -2.36779 | -0.05253 | 33  | H      | 3.416015 | -2.98854 | -0.10818 |
| 11  | C      | 0.254491 | -2.78705 | 0.071587 | 34  | C      | 6.98569  | 0.905096 | 0.527886 |
| 12  | C      | -0.77998 | -1.87069 | 0.138821 | 35  | H      | 7.238872 | 0.624877 | 1.556121 |
| 13  | H      | -0.24059 | 5.533482 | -0.22937 | 36  | H      | 6.862553 | 1.993226 | 0.505932 |
| 14  | H      | 1.591831 | 3.832089 | -0.35194 | 37  | H      | 7.834424 | 0.64794  | -0.11092 |
| 15  | H      | -3.16404 | 2.40487  | 0.230095 | 38  | C      | 5.756555 | 0.196314 | 0.043271 |
| 16  | N      | -1.43739 | 0.42764  | 0.123936 | 39  | C      | -6.0274  | -3.0153  | -0.50018 |
| 17  | N      | 1.251572 | 1.245384 | -0.19076 | 40  | H      | -6.09348 | -3.37704 | -1.53199 |
| 18  | C      | 3.400212 | -0.66529 | -0.28485 | 41  | H      | -6.52618 | -2.04087 | -0.46225 |
| 19  | C      | 4.304353 | -1.14786 | -1.20699 | 42  | H      | -6.58602 | -3.70611 | 0.136427 |
| 20  | S      | 4.214268 | 0.413801 | 0.836522 | 43  | C      | -4.6069  | -2.93153 | -0.02795 |
| 21  | C      | 5.63052  | -0.65605 | -1.02174 | 44  | N      | -2.84715 | 5.048124 | 0.076699 |
| 22  | H      | 4.01814  | -1.80464 | -2.02212 | 45  | O      | -2.51821 | 6.233602 | -0.01281 |
| 23  | H      | 6.463271 | -0.92023 | -1.66411 | 46  | O      | -4.01066 | 4.66713  | 0.220452 |



**Table S3** The cartesian coordinates of S<sub>0</sub> state geometry of **YC-1** optimized by DFT at the B3LYP/6-31G(d,p)/THF-IEFPCM level.

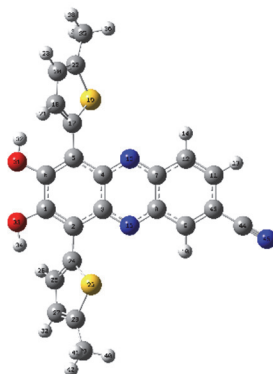

| Tag | Symbol | X        | Y        | Z        | Tag | Symbol | X        | Y        | Z        |
|-----|--------|----------|----------|----------|-----|--------|----------|----------|----------|
| 1   | C      | -0.26764 | -2.54315 | 0.075156 | 24  | C      | -2.59093 | -1.74546 | 0.291243 |
| 2   | C      | -1.15001 | -1.47957 | 0.14623  | 25  | C      | -3.20314 | -2.56376 | 1.216981 |
| 3   | C      | -0.6163  | -0.14339 | 0.065472 | 26  | S      | -3.79007 | -1.11213 | -0.82532 |
| 4   | C      | 0.817933 | 0.06147  | -0.08649 | 27  | C      | -4.61349 | -2.67873 | 1.037821 |
| 5   | C      | 1.704009 | -1.07108 | -0.14319 | 28  | H      | -2.66289 | -3.03696 | 2.030596 |
| 6   | C      | 1.155147 | -2.33922 | -0.05218 | 29  | C      | -5.09234 | -1.96116 | -0.02638 |
| 7   | C      | 0.48268  | 2.335107 | -0.11712 | 30  | H      | -5.25398 | -3.26895 | 1.683837 |
| 8   | C      | -0.9284  | 2.132397 | 0.04943  | 31  | O      | 1.88355  | -3.47283 | -0.06942 |
| 9   | C      | -1.79193 | 3.257504 | 0.120127 | 32  | H      | 2.825318 | -3.22593 | -0.11326 |
| 10  | H      | -2.85527 | 3.089095 | 0.247205 | 33  | O      | -0.64644 | -3.83678 | 0.111875 |
| 11  | C      | 0.14252  | 4.737187 | -0.14648 | 34  | H      | -1.61978 | -3.86549 | 0.148548 |
| 12  | C      | 0.989996 | 3.664019 | -0.21476 | 35  | C      | 6.947233 | 0.088018 | 0.511586 |
| 13  | H      | 0.522862 | 5.749812 | -0.21906 | 36  | H      | 6.991436 | 1.18198  | 0.478921 |
| 14  | H      | 2.059124 | 3.795015 | -0.34217 | 37  | H      | 7.15667  | -0.21741 | 1.542464 |
| 15  | N      | 1.329605 | 1.290613 | -0.18099 | 38  | H      | 7.745827 | -0.30155 | -0.1249  |
| 16  | N      | -1.45119 | 0.892734 | 0.137875 | 39  | C      | -6.50816 | -1.83798 | -0.5041  |
| 17  | C      | 3.162671 | -0.92533 | -0.28588 | 40  | H      | -6.86043 | -0.80144 | -0.46829 |
| 18  | C      | 3.981231 | -1.54412 | -1.20667 | 41  | H      | -6.62211 | -2.18704 | -1.53609 |
| 19  | S      | 4.133924 | 0.023431 | 0.82833  | 42  | H      | -7.16384 | -2.43983 | 0.130301 |
| 20  | C      | 5.367131 | -1.25846 | -1.02612 | 43  | C      | -1.26577 | 4.532153 | 0.023415 |
| 21  | H      | 3.596698 | -2.15348 | -2.01816 | 44  | C      | -2.1349  | 5.669934 | 0.091732 |
| 22  | C      | 5.62361  | -0.4297  | 0.034055 | 45  | N      | -2.83181 | 6.600554 | 0.145593 |
| 23  | H      | 6.148635 | -1.64912 | -1.66842 |     |        |          |          |          |

**Table S4** The cartesian coordinates of  $S_0$  state geometry of **YC-1P** optimized by DFT at the B3LYP/6-31+G(d,p)/THF-IEFPCM level.

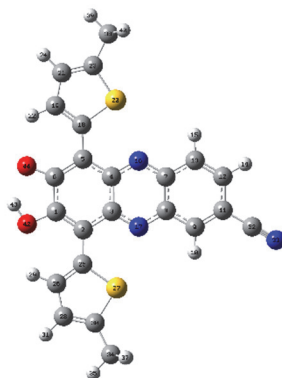

| Tag | Symbol | X        | Y        | Z        | Tag | Symbol | X        | Y        | Z        |
|-----|--------|----------|----------|----------|-----|--------|----------|----------|----------|
| 1   | C      | -0.28193 | -2.67113 | 0.002546 | 23  | C      | 5.644714 | -0.24138 | -0.00359 |
| 2   | C      | -1.19311 | -1.63417 | 0.00649  | 24  | H      | 6.391857 | -2.27126 | -0.00932 |
| 3   | C      | -0.59902 | -0.30896 | 0.004719 | 25  | C      | -2.64473 | -1.8618  | 0.011031 |
| 4   | C      | 0.86745  | -0.12118 | 0.001954 | 26  | C      | -3.30905 | -3.07852 | 0.03845  |
| 5   | C      | 1.773117 | -1.22659 | -0.00062 | 27  | S      | -3.84796 | -0.55753 | -0.02589 |
| 6   | C      | 1.194518 | -2.52231 | -0.00168 | 28  | C      | -4.72979 | -2.97407 | 0.028642 |
| 7   | C      | 0.532879 | 2.179496 | 0.002671 | 29  | H      | -2.7876  | -4.02295 | 0.064697 |
| 8   | C      | -0.88483 | 1.990278 | 0.004093 | 30  | C      | -5.18686 | -1.68234 | -0.00752 |
| 9   | C      | -1.74567 | 3.110349 | 0.004871 | 31  | H      | -5.38947 | -3.83636 | 0.047906 |
| 10  | H      | -2.81822 | 2.94842  | 0.006154 | 32  | C      | -2.07862 | 5.530813 | 0.005103 |
| 11  | C      | -1.21005 | 4.393981 | 0.004314 | 33  | N      | -2.77773 | 6.464354 | 0.005731 |
| 12  | C      | 0.206697 | 4.590058 | 0.003013 | 34  | C      | -6.60716 | -1.19625 | -0.02644 |
| 13  | C      | 1.0528   | 3.507337 | 0.002232 | 35  | H      | -7.29071 | -2.05037 | -0.00746 |
| 14  | H      | 0.60229  | 5.600163 | 0.002675 | 36  | H      | -6.83523 | -0.56313 | 0.839284 |
| 15  | H      | 2.129898 | 3.639281 | 0.001213 | 37  | H      | -6.82735 | -0.60872 | -0.9257  |
| 16  | N      | 1.366934 | 1.122309 | 0.001583 | 38  | C      | 6.893147 | 0.592838 | -0.00294 |
| 17  | N      | -1.40721 | 0.736852 | 0.00535  | 39  | H      | 7.773116 | -0.05783 | -0.00577 |
| 18  | C      | 3.229401 | -1.06883 | -0.0028  | 40  | H      | 6.954364 | 1.243387 | -0.88398 |
| 19  | C      | 4.185011 | -2.0743  | -0.00634 | 41  | H      | 6.956558 | 1.238654 | 0.881434 |
| 20  | S      | 4.059364 | 0.503734 | -0.00027 | 42  | O      | -0.62878 | -3.96948 | 0.001203 |
| 21  | C      | 5.532035 | -1.60731 | -0.00675 | 43  | H      | 0.273641 | -4.40565 | -0.00343 |
| 22  | H      | 3.902633 | -3.11647 | -0.00838 | 44  | O      | 1.811527 | -3.64265 | -0.00597 |

**Table S5** The cartesian coordinates of S<sub>0</sub> state geometry of **YC-2** optimized by DFT at the B3LYP/6-31G(d,p)/THF-IEFPCM level.

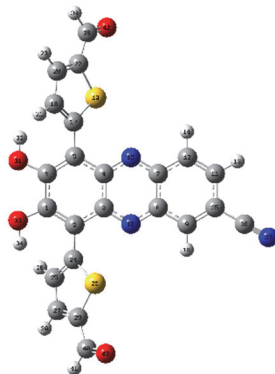

| Tag | Symbol | X        | Y        | Z        | Tag | Symbol | X        | Y        | Z        |
|-----|--------|----------|----------|----------|-----|--------|----------|----------|----------|
| 1   | C      | 0.412513 | -2.5576  | -0.11163 | 23  | H      | -5.98232 | -2.15677 | 1.75151  |
| 2   | C      | 1.230463 | -1.44414 | -0.19242 | 24  | C      | 2.679554 | -1.6156  | -0.3797  |
| 3   | C      | 0.623407 | -0.13962 | -0.08357 | 25  | C      | 3.298716 | -2.45937 | -1.29253 |
| 4   | C      | -0.81411 | -0.01748 | 0.09193  | 26  | S      | 3.858808 | -0.81476 | 0.627398 |
| 5   | C      | -1.63496 | -1.20062 | 0.168472 | 27  | C      | 4.70859  | -2.46672 | -1.18055 |
| 6   | C      | -1.01894 | -2.43551 | 0.045834 | 28  | H      | 2.753348 | -3.01515 | -2.04729 |
| 7   | C      | -0.60957 | 2.272156 | 0.120541 | 29  | C      | 5.168992 | -1.63483 | -0.18043 |
| 8   | C      | 0.808988 | 2.150146 | -0.05814 | 30  | H      | 5.36598  | -3.04985 | -1.81558 |
| 9   | C      | 1.608097 | 3.32166  | -0.13247 | 31  | O      | -1.66884 | -3.61422 | 0.053038 |
| 10  | H      | 2.67822  | 3.214569 | -0.26799 | 32  | H      | -2.6273  | -3.45004 | 0.073582 |
| 11  | C      | -0.40685 | 4.687464 | 0.149841 | 33  | O      | 0.850133 | -3.83036 | -0.15994 |
| 12  | C      | -1.19252 | 3.568594 | 0.223088 | 34  | H      | 1.822487 | -3.83288 | -0.181   |
| 13  | H      | -0.84317 | 5.676875 | 0.226353 | 35  | C      | 1.009643 | 4.563136 | -0.02997 |
| 14  | H      | -2.26616 | 3.638778 | 0.358621 | 36  | C      | 1.810705 | 5.749929 | -0.10354 |
| 15  | N      | -1.39212 | 1.179051 | 0.192928 | 37  | N      | 2.451168 | 6.719708 | -0.16207 |
| 16  | N      | 1.396801 | 0.941202 | -0.15815 | 38  | C      | -6.87106 | -0.2113  | -0.15079 |
| 17  | C      | -3.09149 | -1.12873 | 0.363359 | 39  | H      | -7.69492 | -0.69036 | 0.415409 |
| 18  | C      | -3.84555 | -1.90256 | 1.23689  | 40  | C      | 6.553775 | -1.3931  | 0.194677 |
| 19  | S      | -4.11783 | -0.08048 | -0.58232 | 41  | H      | 7.290163 | -1.97243 | -0.39766 |
| 20  | C      | -5.23561 | -1.66142 | 1.141206 | 42  | O      | -7.09246 | 0.654373 | -0.9867  |
| 21  | H      | -3.40379 | -2.58393 | 1.955694 | 43  | O      | 6.910174 | -0.62861 | 1.080904 |
| 22  | C      | -5.54796 | -0.70853 | 0.193203 |     |        |          |          |          |

**Table S6** The cartesian coordinates of  $S_0$  state geometry of **YC-2P** optimized by DFT at the B3LYP/6-31+G(d,p)/THF-IEFPCM level.

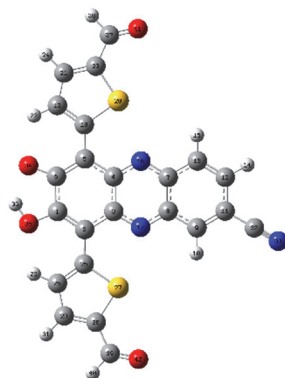

| Tag | Symbol | X        | Y        | Z        | Tag | Symbol | X        | Y        | Z        |
|-----|--------|----------|----------|----------|-----|--------|----------|----------|----------|
| 1   | C      | -0.40748 | -2.7079  | -0.00533 | 22  | H      | 3.733504 | -3.3492  | -0.00958 |
| 2   | C      | -1.26442 | -1.62397 | -0.00119 | 23  | C      | 5.587971 | -0.55038 | 0.003904 |
| 3   | C      | -0.61066 | -0.32344 | -0.00215 | 24  | H      | 6.250873 | -2.62526 | -0.00138 |
| 4   | C      | 0.855018 | -0.2022  | -0.0037  | 25  | C      | -2.72086 | -1.77572 | 0.003592 |
| 5   | C      | 1.713047 | -1.35498 | -0.00537 | 26  | C      | -3.43428 | -2.97961 | 0.013727 |
| 6   | C      | 1.080216 | -2.62723 | -0.00785 | 27  | S      | -3.83828 | -0.4127  | -0.00317 |
| 7   | C      | 0.628157 | 2.108963 | -0.00281 | 28  | C      | -4.83064 | -2.81401 | 0.015384 |
| 8   | C      | -0.79446 | 1.98434  | -0.00207 | 29  | H      | -2.94965 | -3.94271 | 0.020024 |
| 9   | C      | -1.60465 | 3.142641 | -0.00166 | 30  | C      | -5.22151 | -1.48461 | 0.006367 |
| 10  | H      | -2.68347 | 3.031253 | -0.00113 | 31  | H      | -5.53533 | -3.63945 | 0.023065 |
| 11  | C      | -1.00705 | 4.397112 | -0.00191 | 32  | C      | -1.82031 | 5.576108 | -0.00153 |
| 12  | C      | 0.416415 | 4.527684 | -0.0025  | 33  | N      | -2.47172 | 6.54259  | -0.00124 |
| 13  | C      | 1.212413 | 3.407204 | -0.00293 | 34  | O      | 1.638805 | -3.77086 | -0.01147 |
| 14  | H      | 0.858139 | 5.518262 | -0.00263 | 35  | O      | -0.81133 | -3.982   | -0.00737 |
| 15  | H      | 2.294314 | 3.488022 | -0.00344 | 36  | H      | 0.065819 | -4.46735 | -0.01032 |
| 16  | N      | 1.412098 | 1.00962  | -0.00363 | 37  | C      | 6.847064 | 0.143161 | 0.010639 |
| 17  | N      | -1.37179 | 0.754872 | -0.00155 | 38  | H      | 7.729817 | -0.52793 | 0.010346 |
| 18  | C      | 3.163373 | -1.25421 | -0.00403 | 39  | C      | -6.58345 | -1.00593 | 0.006057 |
| 19  | C      | 4.071615 | -2.32456 | -0.00569 | 40  | H      | -7.34393 | -1.81219 | 0.013108 |
| 20  | S      | 4.041627 | 0.278136 | 0.002336 | 41  | O      | 7.005998 | 1.370334 | 0.016758 |
| 21  | C      | 5.417894 | -1.92879 | -0.00123 | 42  | O      | -6.93526 | 0.176534 | -0.00117 |

**Table S7** Excitation energy, oscillator strength, main transition orbital, and their contribution for singlet states of **KI-3**, **KI-5**, **YC-1**, and **YC-2** at B3LYP/6-31G(d,p)/THF-IEFPCM level, and **YC-1P** and **YC-2P** at B3LYP/6-31G+(d,p)/THF-IEFPCM level.

| PS           | State | Excitation energy / eV | Oscillator strength | Main transition orbital | Contribution | Transition |
|--------------|-------|------------------------|---------------------|-------------------------|--------------|------------|
| <b>KI-3</b>  | S1    | 2.49                   | 0.0974              | HOMO→LUMO               | 0.99         | $\pi\pi^*$ |
|              | S2    | 2.98                   | 0.0019              | HOMO-2→LUMO             | 0.88         | $n\pi^*$   |
|              | S3    | 3.08                   | 0.1321              | HOMO-1→LUMO             | 0.71         | $\pi\pi^*$ |
| <b>KI-5</b>  | S1    | 2.23                   | 0.0539              | HOMO→LUMO               | 0.99         | $\pi\pi^*$ |
|              | S2    | 2.77                   | 0.0321              | HOMO-1→LUMO             | 0.92         | $\pi\pi^*$ |
|              | S3    | 2.94                   | 0.0013              | HOMO-3→LUMO             | 0.72         | $n\pi^*$   |
| <b>YC-1</b>  | S1    | 2.42                   | 0.0806              | HOMO→LUMO               | 0.99         | $\pi\pi^*$ |
|              | S2    | 2.97                   | 0.036               | HOMO-1→LUMO             | 0.92         | $\pi\pi^*$ |
|              | S3    | 3.07                   | 0.0017              | HOMO-4→LUMO             | 0.38         | $\pi\pi^*$ |
|              |       |                        |                     | HOMO-3→LUMO             | 0.45         | $n\pi^*$   |
| <b>YC-2</b>  | S1    | 2.62                   | 0.1722              | HOMO→LUMO               | 0.98         | $\pi\pi^*$ |
|              | S2    | 3.07                   | 0.0044              | HOMO-2→LUMO             | 0.88         | $n\pi^*$   |
|              | S3    | 3.23                   | 0.2277              | HOMO-1→LUMO             | 0.72         | $\pi\pi^*$ |
| <b>YC-1P</b> | S1    | 1.88                   | 0.0696              | HOMO→LUMO               | 0.97         | $\pi\pi^*$ |
|              | S2    | 2.72                   | 0.1078              | HOMO-1→LUMO             | 0.82         | $\pi\pi^*$ |
|              | S3    | 3.06                   | 0.5963              | HOMO→LUMO+1             | 0.83         | $\pi\pi^*$ |
| <b>YC-2P</b> | S1    | 2.18                   | 0.2028              | HOMO→LUMO               | 0.94         | $\pi\pi^*$ |
|              | S2    | 2.66                   | 0.5482              | HOMO→LUMO+1             | 0.93         | $\pi\pi^*$ |
|              | S3    | 2.98                   | 0.5275              | HOMO-1→LUMO             | 0.73         | $\pi\pi^*$ |

**Table S8** Excitation energy, oscillator strength, main transition orbital, and their contribution for triplet states of **KI-3**, **KI-5**, **YC-1**, and **YC-2** at B3LYP/6-31G(d,p)/THF-IEFPCM level, and **YC-1P** and **YC-2P** at B3LYP/6-31G+(d,p)/THF-IEFPCM level.

| PS           | State          | Excitation energy / eV | Main transition orbital | Contribution | Transition |
|--------------|----------------|------------------------|-------------------------|--------------|------------|
| <b>KI-3</b>  | T <sub>1</sub> | 1.77                   | HOMO→LUMO               | 0.81         | $\pi\pi^*$ |
|              | T <sub>2</sub> | 2.34                   | HOMO-1→LUMO             | 0.80         | $\pi\pi^*$ |
|              | T <sub>3</sub> | 2.48                   | HOMO→LUMO+1             | 0.45         | $\pi\pi^*$ |
|              | T <sub>4</sub> | 2.61                   | HOMO-2→LUMO             | 0.72         | $n\pi^*$   |
| <b>KI-5</b>  | T <sub>1</sub> | 1.68                   | HOMO→LUMO               | 0.77         | $\pi\pi^*$ |
|              | T <sub>2</sub> | 2.29                   | HOMO-1→LUMO             | 0.66         | $\pi\pi^*$ |
|              | T <sub>3</sub> | 2.59                   | HOMO-3→LUMO             | 0.59         | $n\pi^*$   |
|              | T <sub>4</sub> | 2.64                   | HOMO-4→LUMO             | 0.46         | $\pi\pi^*$ |
| <b>YC-1</b>  | T <sub>1</sub> | 1.75                   | HOMO→LUMO               | 0.83         | $\pi\pi^*$ |
|              | T <sub>2</sub> | 2.38                   | HOMO-1→LUMO             | 0.71         | $\pi\pi^*$ |
|              | T <sub>3</sub> | 2.66                   | HOMO-3→LUMO             | 0.44         | $n\pi^*$   |
|              | T <sub>4</sub> | 2.72                   | HOMO-4→LUMO             | 0.36         | $n\pi^*$   |
| <b>YC-2</b>  | T <sub>1</sub> | 1.80                   | HOMO→LUMO               | 0.88         | $\pi\pi^*$ |
|              | T <sub>2</sub> | 2.37                   | HOMO-1→LUMO             | 0.85         | $\pi\pi^*$ |
|              | T <sub>3</sub> | 2.48                   | HOMO→LUMO+1             | 0.55         | $\pi\pi^*$ |
|              | T <sub>4</sub> | 2.65                   | HOMO→LUMO+2             | 0.35         | $\pi\pi^*$ |
|              | T <sub>5</sub> | 2.67                   | HOMO-2→LUMO             | 0.74         | $n\pi^*$   |
| <b>YC-1P</b> | T <sub>1</sub> | 1.43                   | HOMO→LUMO               | 0.93         | $\pi\pi^*$ |
|              | T <sub>2</sub> | 1.89                   | HOMO-1→LUMO             | 0.87         | $\pi\pi^*$ |
|              | T <sub>3</sub> | 2.36                   | HOMO→LUMO+1             | 0.72         | $\pi\pi^*$ |
|              | T <sub>4</sub> | 2.78                   | HOMO→LUMO+2             | 0.31         | $\pi\pi^*$ |
| <b>YC-2P</b> | T <sub>1</sub> | 1.62                   | HOMO→LUMO               | 0.93         | $\pi\pi^*$ |
|              | T <sub>2</sub> | 1.91                   | HOMO-1→LUMO             | 0.87         | $\pi\pi^*$ |
|              | T <sub>3</sub> | 2.06                   | HOMO→LUMO+1             | 0.72         | $\pi\pi^*$ |
|              | T <sub>4</sub> | 2.47                   | HOMO→LUMO+2             | 0.31         | $\pi\pi^*$ |

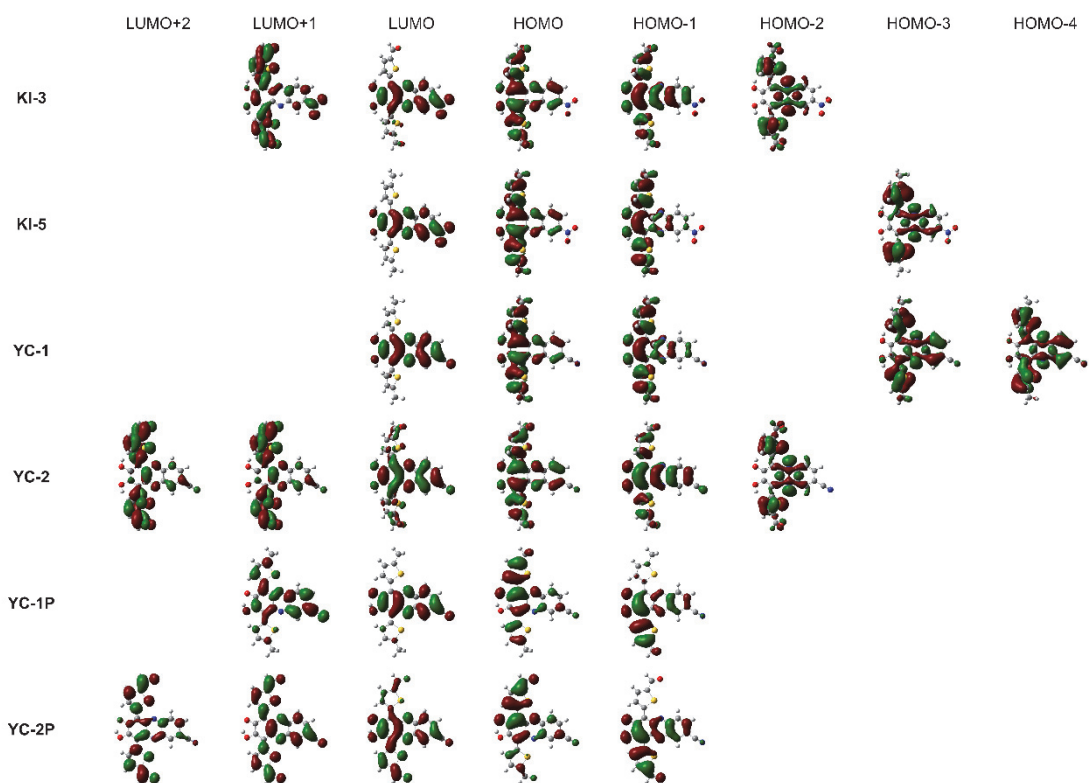

**Fig. S9** Molecular orbitals of **KI-3**, **KI-5**, **YC-1**, and **YC-2** at B3LYP/6-31G(d,p)/THF-IEFPCM level, and **YC-1P** and **YC-2P** at B3LYP/6-31G+(d,p)/THF-IEFPCM level.

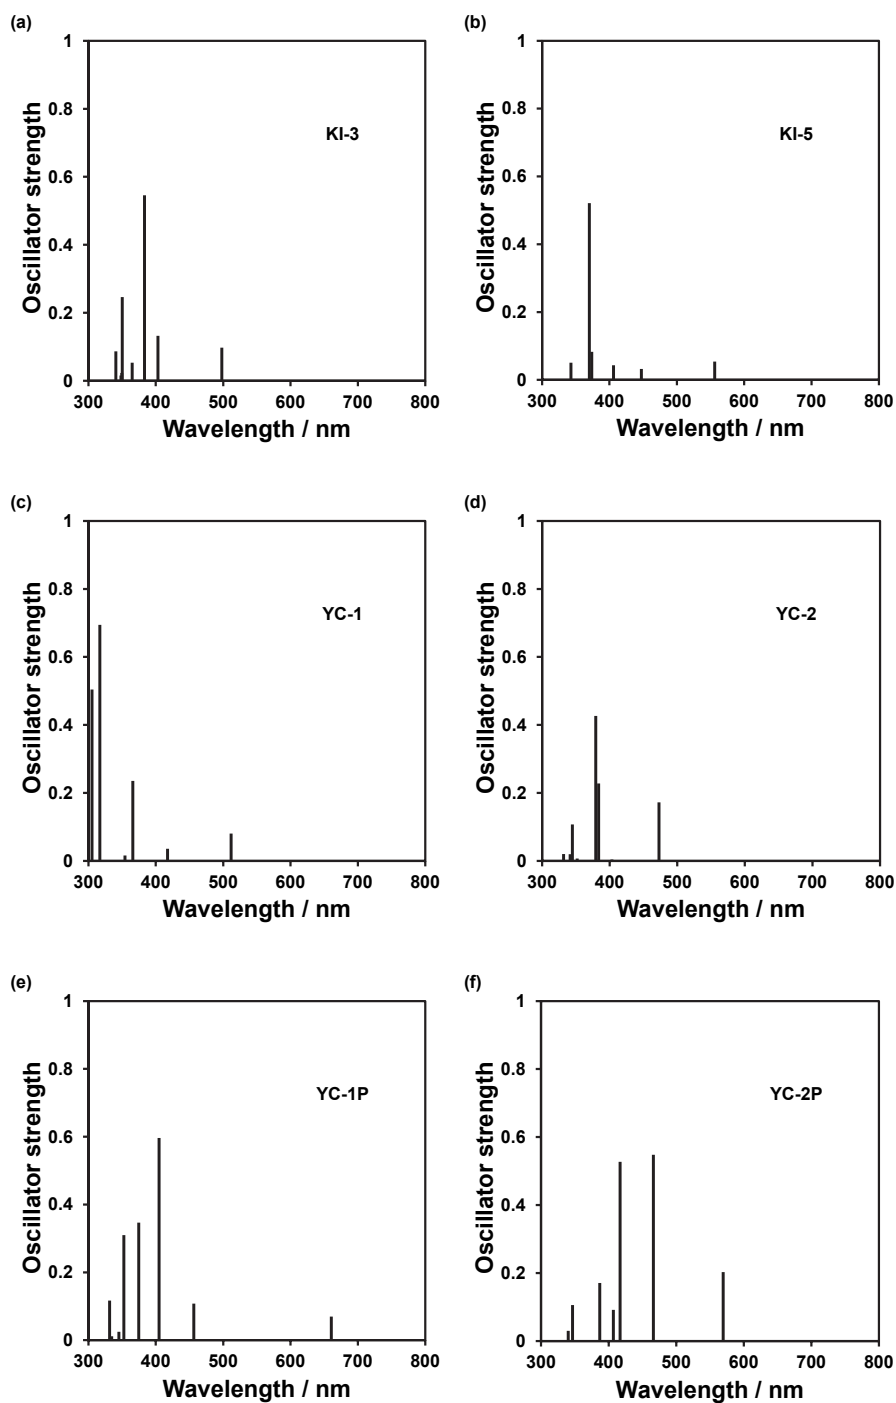

**Fig. S10** Calculated oscillator strength of (a) **KI-3**, (b) **KI-5**, (c) **YC-1**, and (d) **YC-2** derived from TDDFT calculations at B3LYP/6-31G(d,p)/THF-IEFPCM level, and (e) **YC-1P** and (f) **YC-2P** at B3LYP/6-31+G(d,p)/THF-IEFPCM level.



#### 4. Optical properties

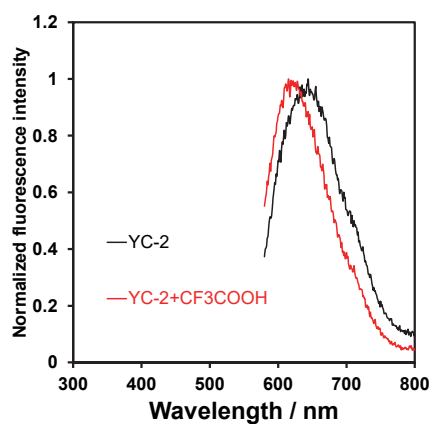

**Fig. S11** Fluorescence spectra ( $\lambda_{\text{ex}} = 448$  nm) of YC-2 in THF with and without trifluoroacetic acid (TFA) (50 eq.).

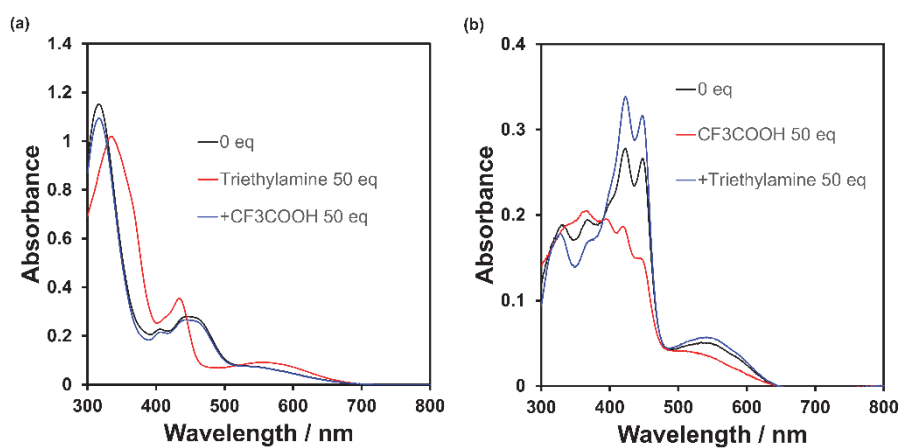

**Fig. S12** (a) Photoabsorption spectra of YC-1 in THF with and without triethylamine (TEA), and after addition of trifluoroacetic acid (TFA) to THF solution of YC-1 containing TEA. (b) Photoabsorption spectra of YC-2 in THF with and without TFA, and after addition of TEA to THF solution of YC-1 containing TFA.

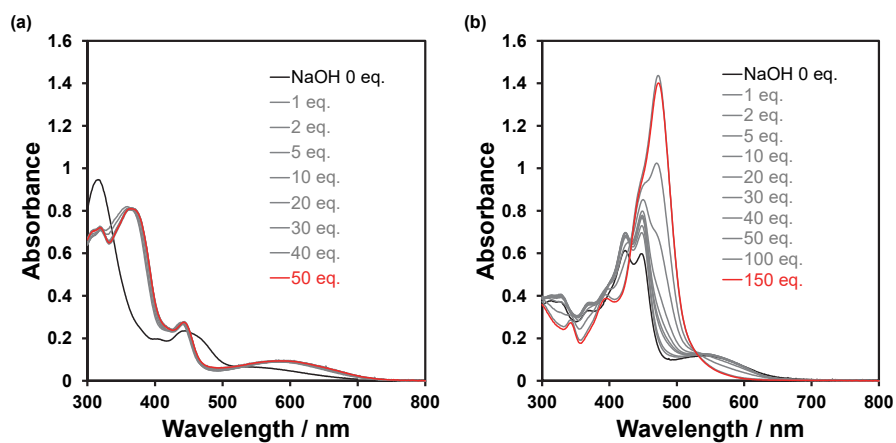

**Fig. S13** Photoabsorption spectra of (a) YC-1 and (b) YC-2 upon the addition of NaOH in THF.

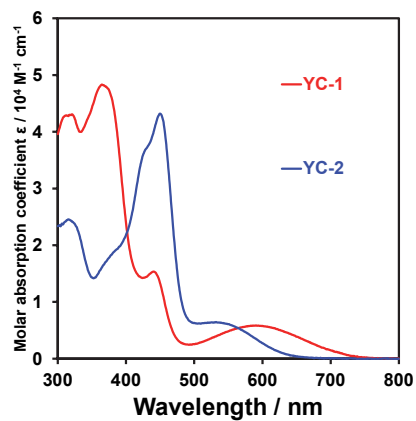

**Fig. S14** Photoabsorption spectra of YC-1 and YC-2 in DMSO.

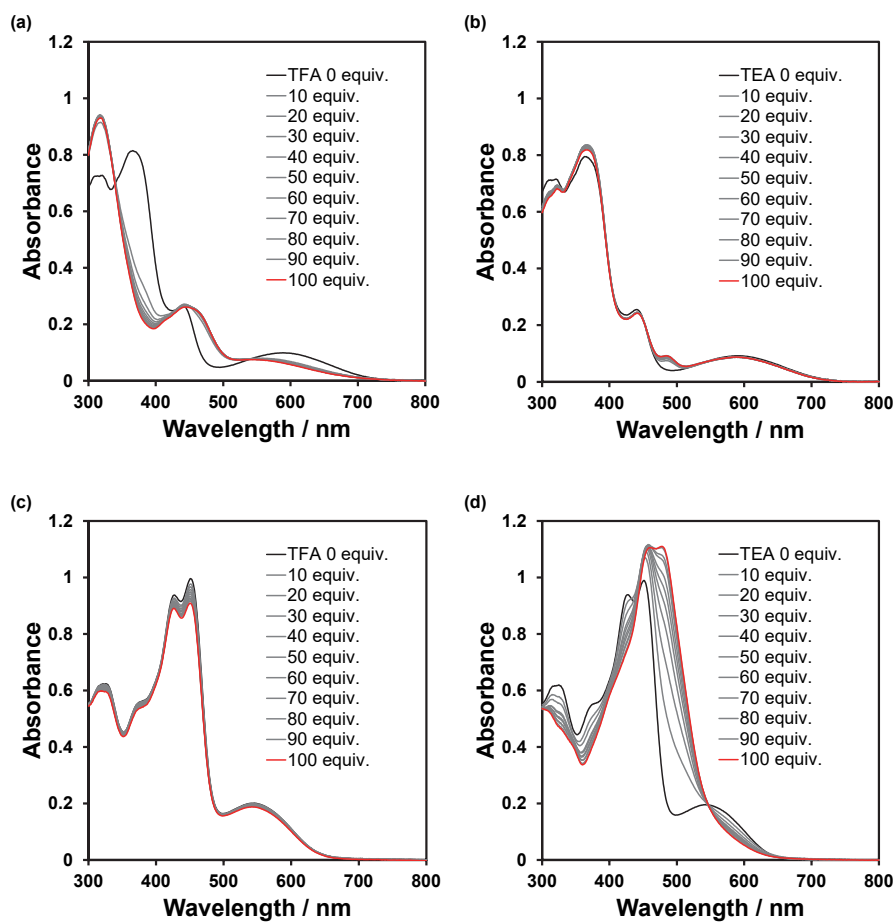

**Fig. S15** Photoabsorption spectra of (a) YC-1 and (c) YC-2 upon the addition of trifluoroacetic acid (TFA) in DMSO, and (b) YC-1 and (d) YC-2 upon the addition of triethylamine (TEA) in DMSO.

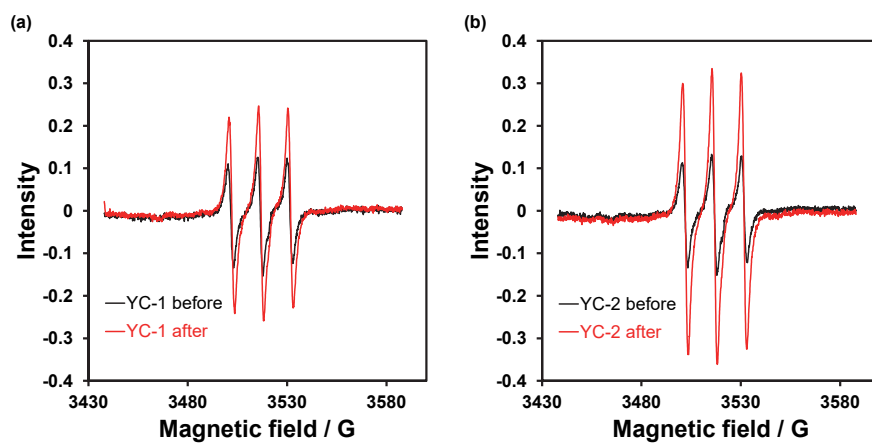

**Fig. S16** EPR spectra of air-saturated THF solutions containing 4-oxo-TEMP (50 mM) and (a) YC-1 or (b) YC-2 (5  $\mu\text{M}$ ) before and after exposure to continuous visible light ( $>510$  nm, and  $30 \text{ mW cm}^{-2}$ ) for 60 min. The characteristic 1:1:1 triplet signal originates from a stable nitroxide radical (4-oxo-TEMPO) formed by the reaction of 4-oxo-TEMP with  $^1\text{O}_2$ .
